# Supplementary material
Source: PubMed Central journal article supplement (PMC6615669)
Supplement: supp_RA118.007231_142694_2_supp_334794_prv01t.pdf [file supp_RA118.007231_142694_2_supp_334794_prv01t.pdf]

## Supporting Information

The natural product antroalbol H promotes phosphorylation of liver kinase B1 (LKB1) at threonine 189 and thereby enhances cellular glucose uptake

**Fang Wang<sup>1,4,#</sup>, Xiaoyan Yang<sup>4,5,#</sup>, Yanting Lu<sup>1,4</sup>, Zhenghui Li<sup>2</sup>, Yuhui Xu<sup>1</sup>, Jing Hu<sup>1</sup>, Jikai Liu<sup>2,\*</sup> and Wenyong Xiong<sup>1,3,\*</sup>**

From the <sup>1</sup>State Key Laboratory of Phytochemistry and Plant Resources in West China, Kunming Institute of Botany, Chinese Academy of Sciences, Kunming 650201, P. R. China; <sup>2</sup>School of Pharmaceutical Sciences, South-Central University for Nationalities, Wuhan 430074, P. R. China; <sup>3</sup>The General Hospital of Ningxia Medical University, Yinchuan 750004, P. R. China; <sup>4</sup>University of the Chinese Academy of Sciences, Beijing 100049, P. R. China; <sup>5</sup>Faculty of Life Science and Technology, Kunming University of Science and Technology, Kunming 650201, P. R. China

Running title: *AH enhances cellular glucose uptake through T189 of LKB1*

# Authors contributed equally to this work

\*To whom correspondence should be addressed: Jikai Liu: School of Pharmaceutical Sciences, South-Central University for Nationalities, Wuhan 430074, P. R. China;

[liujikai@mail.scuec.edu.cn](mailto:liujikai@mail.scuec.edu.cn); Tel. 86-27-67842267. Wenyong Xiong: State Key Laboratory of Phytochemistry and Plant Resources in West China, Kunming Institute of Botany, Chinese Academy of Sciences, Kunming 650201, P. R. China; The General Hospital of Ningxia Medical University, Yinchuan 750004, P. R. China; [xiong.wenyong@mail.kib.ac.cn](mailto:xiong.wenyong@mail.kib.ac.cn); Tel. 86-871-65216750.

**Keywords:** sesquiterpene, fungi, glucose metabolism, liver kinase B1 (LKB1), AMP-activated protein kinase (AMPK), glucose transporter type 4 (GLUT4), diabetes, glucose homeostasis, Basidiomycete, energy sensing

## Table of Content

**Table S1.**  $^1\text{H}$  (400 Hz) and  $^{13}\text{C}$  NMR (100 Hz) NMR data in  $\text{CDCl}_3$  for antroalbol H

**Table S2.** Antibodies used for western blotting

**Table S3.** SiRNA nucleotide sequence

**Figure S1.** Effects of antroalbol H on cell viability in 3T3-L1 adipocytes

**Figure S2.** Antroalbol H does not change the phosphorylation of CaMKII and  $\text{Ca}^{2+}$

**Figure S3.** Antroalbol H does not change the protein levels of GLUT4.

**Figure S4.** Key 2D NMR correlations of antroalbol H

**Figure S5.**  $^1\text{H}$  NMR (400MHz,  $\text{CDCl}_3$ ) spectrum of antroalbol H

**Figure S6.**  $^{13}\text{C}$  NMR (400MHz,  $\text{CDCl}_3$ ) spectrum of antroalbol H

**Figure S7.** HSQC spectrum of antroalbol H

**Figure S8.**  $^1\text{H}$ - $^1\text{H}$  COSY spectrum of antroalbol H

**Figure S9.** HMBC spectrum of antroalbol H

**Figure S10.** ROESY spectrum of antroalbol H

**Figure S11.** HR-ESI-MS spectrum of antroalbol H

**Figure S12.** IR spectrum of antroalbol H

**Table S1.**  $^1\text{H}$  (400 Hz) and  $^{13}\text{C}$  NMR (100 Hz) NMR data in  $\text{CDCl}_3$  for antroalbol H

| Position | $\delta_{\text{C}}$ type | $\delta_{\text{H}}$ mult. ( $J$ in Hz) |
|----------|--------------------------|----------------------------------------|
| 1        | 40.1, $\text{CH}_2$      | 2.72, d (14.8)<br>2.33, d (14.8)       |
| 2        | 211.9, C                 |                                        |
| 3        | 73.5, CH                 | 4.01, t (8.0)                          |
| 4        | 34.1, $\text{CH}_2$      | 2.14, m                                |
| 5        | 26.1, $\text{CH}_2$      | 1.86, m<br>1.55, m                     |
| 6        | 55.6, C                  |                                        |
| 7        | 82.1, C                  |                                        |
| 8        | 214.1, C                 |                                        |
| 9        | 33.4, $\text{CH}_2$      | 2.66, m<br>2.38, m                     |
| 10       | 36.1, $\text{CH}_2$      | 1.78, m<br>1.63, m                     |
| 11       | 38.2, C                  |                                        |
| 12       | 28.0, $\text{CH}_3$      | 1.01, s                                |
| 13       | 25.1, $\text{CH}_3$      | 1.12, s                                |
| 14       | 26.4, $\text{CH}_3$      | 1.36, s                                |

**Table S2.** Antibodies used for western blotting

| <b>Antibody</b>                                    | <b>Vendor</b>             | <b>Cat. No.</b> | <b>Fold Dilution</b> |
|----------------------------------------------------|---------------------------|-----------------|----------------------|
| Rabbit anti-AMPK $\alpha$                          | Cell Signaling Technology | 2532            | 1000                 |
| Rabbit anti-phospho-AMPK $\alpha$ (Thr172)         | Cell Signaling Technology | 2535            | 1000                 |
| Rabbit anti-phospho-AMPK $\beta$ (Ser182)          | Cell Signaling Technology | 4186            | 1000                 |
| Rabbit anti- AMPK $\beta$ 1/2                      | Cell Signaling Technology | 4150            | 1000                 |
| Rabbit anti-phospho-Acetyl-CoA Carboxylase (Ser79) | Cell Signaling Technology | 11818           | 1000                 |
| Rabbit anti- Acetyl-CoA Carboxylase                | Cell Signaling Technology | 3662            | 1000                 |
| Rabbit anti-Akt                                    | Cell Signaling Technology | 9272            | 1000                 |
| Rabbit anti-phospho-Akt (S473)                     | Cell Signaling Technology | 4060            | 1000                 |
| Rabbit anti-phospho-Akt (T308)                     | Cell Signaling Technology | 13038           | 1000                 |
| Rabbit anti- LKB1                                  | Santa Cruz Biotechnology  | Sc-374300       | 1000                 |
| Rabbit anti-phospho-LKB1 (T189)                    | Cell Signaling Technology | 3054            | 1000                 |
| Rabbit anti- phospho-LKB1 (S307)                   | Merck-Millipore           | 09-478          | 1000                 |
| Rabbit anti-phospho-LKB1 (S428)                    | Cell Signaling Technology | 3482            | 1000                 |
| Rabbit anti-CaMKII                                 | Cell Signaling Technology | 3362            | 1000                 |
| Rabbit anti-phospho-CaMKII (T286)                  | Cell Signaling Technology | 12716           | 1000                 |
| Mouse anti-N-cadherin                              | Cell Signaling Technology | 13116           | 1000                 |
| Mouse anti-GLUT4                                   | Abcam                     | Ab654           | 1000                 |
| Mouse anti- $\beta$ -Actin                         | Sigma                     | A5316           | 8000                 |

|                                                                   |                                          |       |      |
|-------------------------------------------------------------------|------------------------------------------|-------|------|
| Alexa Fluor ® 488-conjugated AffiniPure goat anti-mouse IgG (H+L) | Jackson ImmunoResearch Laboratories Inc. | A5316 | 2000 |
| CyTM 3-conjugated AffiniPure goat anti-mouse IgG (H+L)            | Jackson ImmunoResearch Laboratories Inc. | A5316 | 2000 |

**Table S3.** siRNA nucleotide sequence.

| <b>Genes</b>  | <b>siRNA sequence</b> |
|---------------|-----------------------|
| Control       | UUCUCCGAACGUGUCACGUTT |
| AMPK $\alpha$ | AUGAUGUCAGAUGGUGAAUUU |
| LKB1          | CGGUCAAGAUCUCAAGAAUU  |

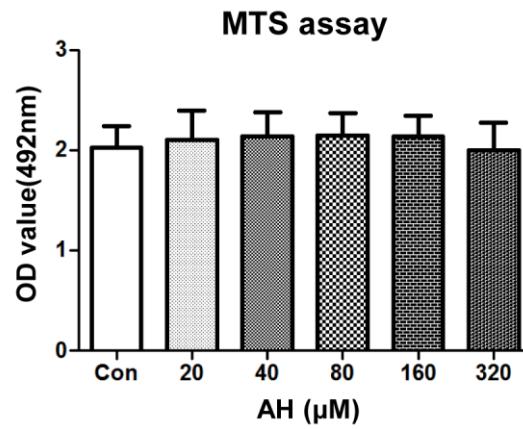

**Figure S1.** Effects of antroalbol H on cell viability in 3T3-L1 adipocytes. 3T3-L1 adipocytes were treated with 20 - 320  $\mu\text{M}$  AH for 24 h, the cytotoxicity was detected by MTS assay. Results were represented as means  $\pm$ SEM (n = 6).

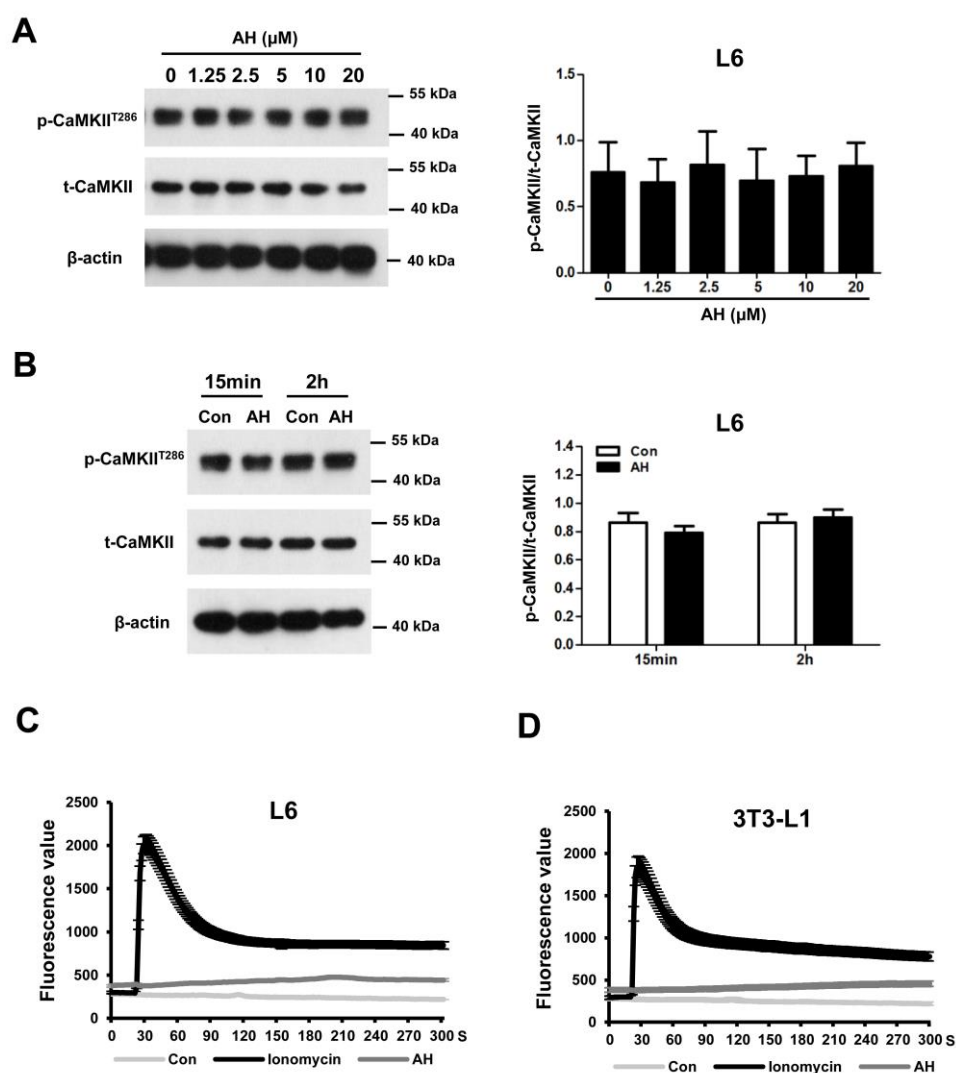

**Figure S2.** Antroalbol H does not change the phosphorylation of CaMKII and  $\text{Ca}^{2+}$ . (A and B) Immunoblots of p-CaMKII<sup>T286</sup>, t-CaMKII and  $\beta$ -actin in L6 myotubes. L6 myotubes were treated with 0-20  $\mu\text{M}$  AH for 24 h or 10  $\mu\text{M}$  AH for indicated hours. Results were represented as means  $\pm$  SEM (n = 3). (C and D)  $\text{Ca}^{2+}$  signal assay in L6 myotubes and 3T3-L1 adipocytes. Cells were grown on 24-well plate and washed three times with  $\text{Ca}^{2+}$ -containing resting buffer (145 mM NaCl, 5 mM KCl, 2.6 mM  $\text{CaCl}_2$ , 1 mM  $\text{MgCl}_2$ , 5.6 mM D-glucose, and 10 mM HEPES, pH 7.4). Loading with 10  $\mu\text{M}$  Fluo 3-AM was for 30 min at 37  $^\circ\text{C}$ . Washed plate were mounted in fluorescence microscope and recorded of fluorescence (excitation 490 nm, emission 530 nm) was initiated about 30 seconds prior to addition of 0.1% DMSO (Con), 1  $\mu\text{M}$  ionomycin or 10  $\mu\text{M}$  AH. Results were represented as the net increase value of fluorescence in 15-20 cells per condition (n = 3).

**A**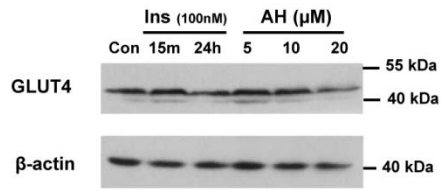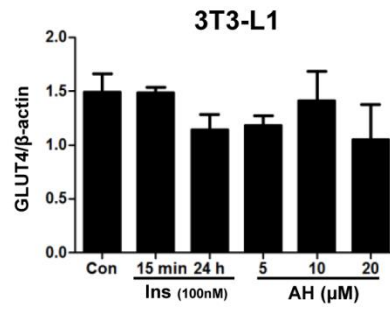**B**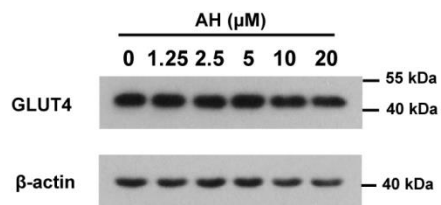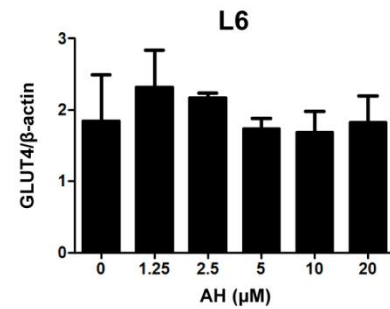

**Figure S3.** Antroalbol H does not change the protein levels of GLUT4. (A) 3T3-L1 adipocytes were treated with 5-20  $\mu$ M AH for 24 h or 100 nM insulin for indicated times, then immunoblots of GLUT4 and  $\beta$ -actin were performed. (B) L6 myotubes were treated with 0-20  $\mu$ M AH for 24 h, GLUT4 protein levels also assayed by western blotting. Results were represented as means  $\pm$  SEM ( $n = 3$ ).



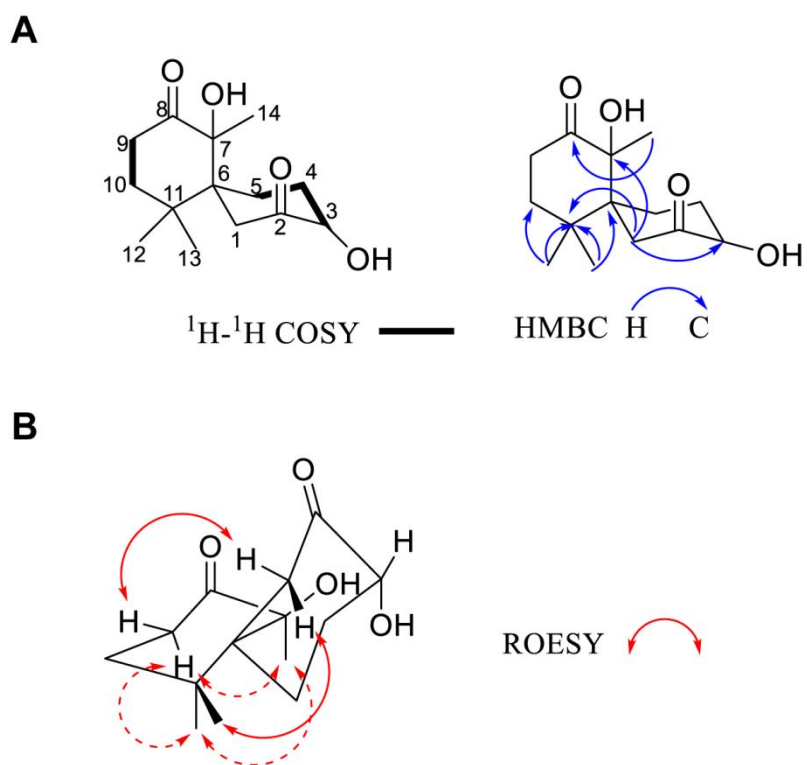

**Figure S4.** Key 2D NMR correlations of antroalbol H. (A)  $^1\text{H}-^1\text{H}$  COSY and key HMBC correlations of antroalbol H. (B) Key NOESY correlations of antroalbol H.

lab7  
lab7 H

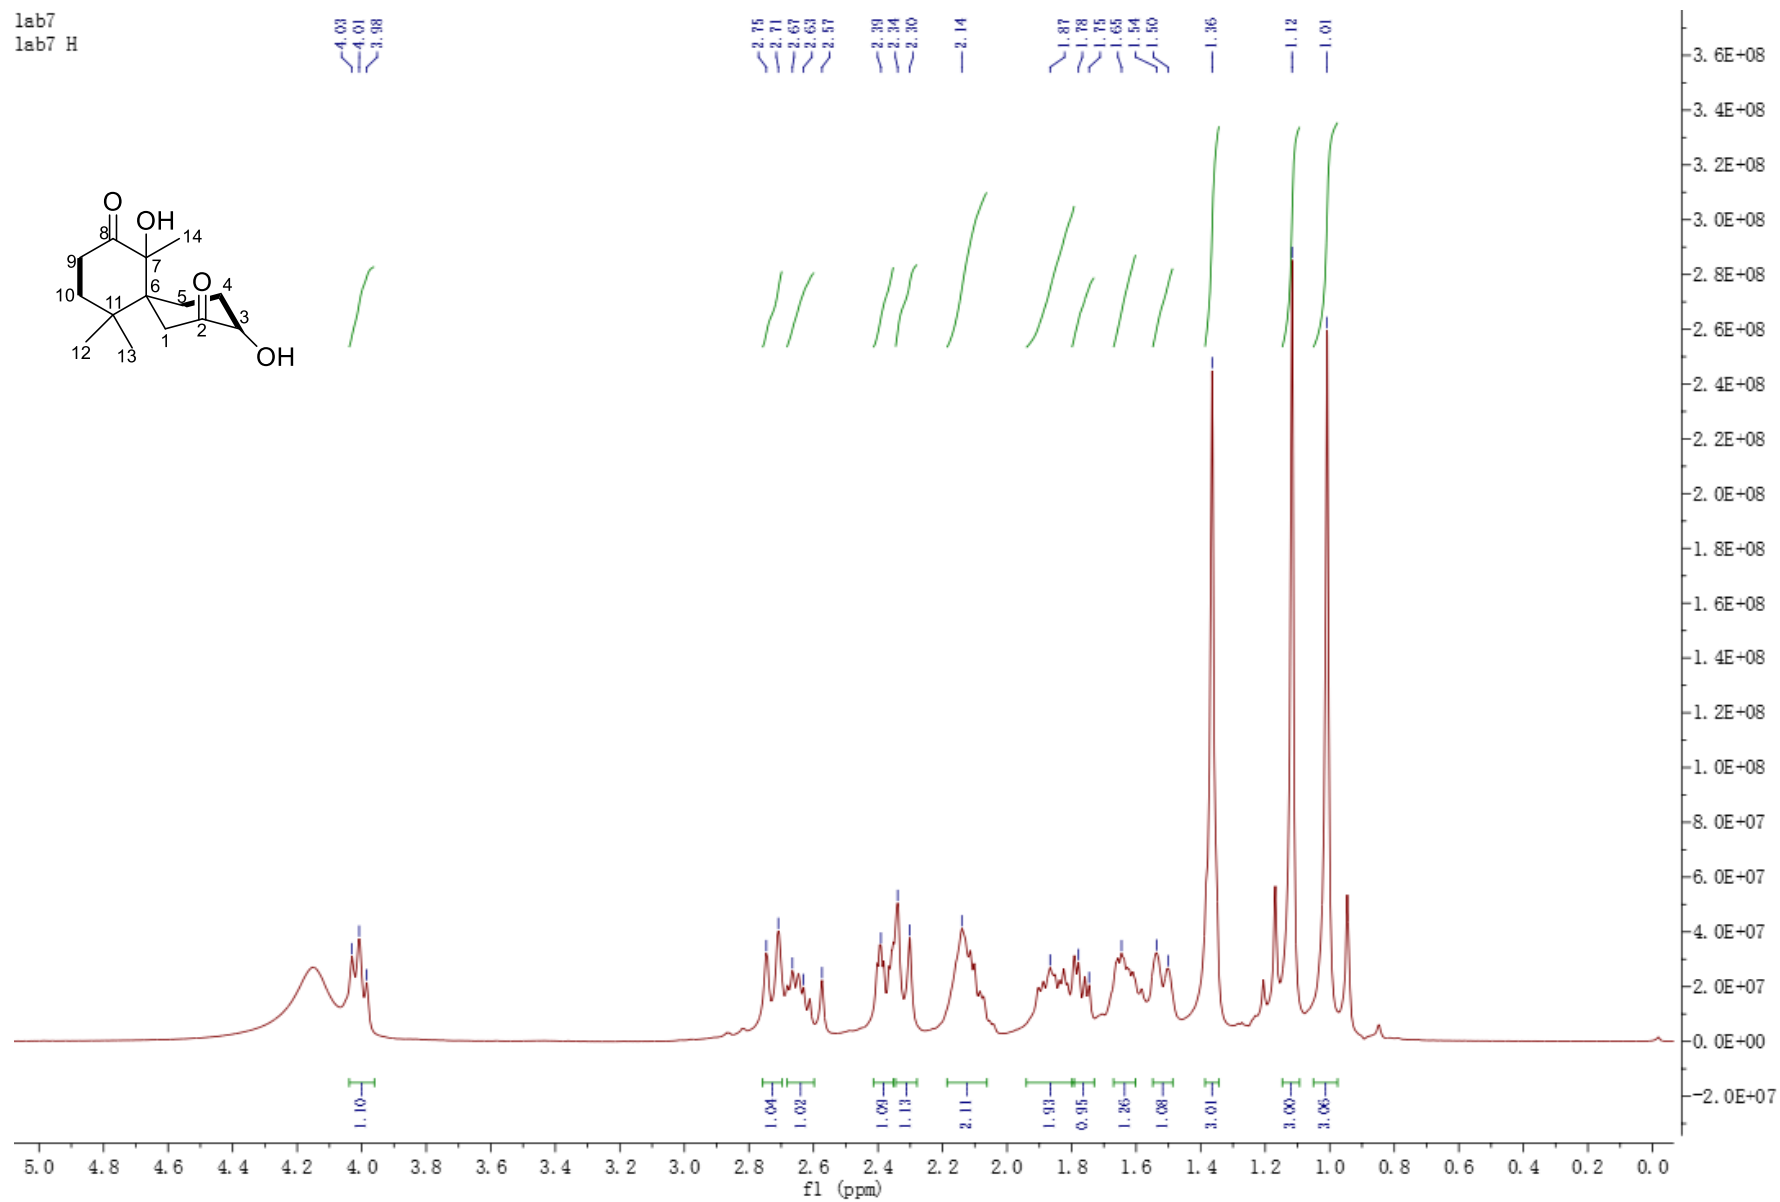

Figure S5. <sup>1</sup>H NMR (400MHz, CDCl<sub>3</sub>) spectrum of antroalbol H

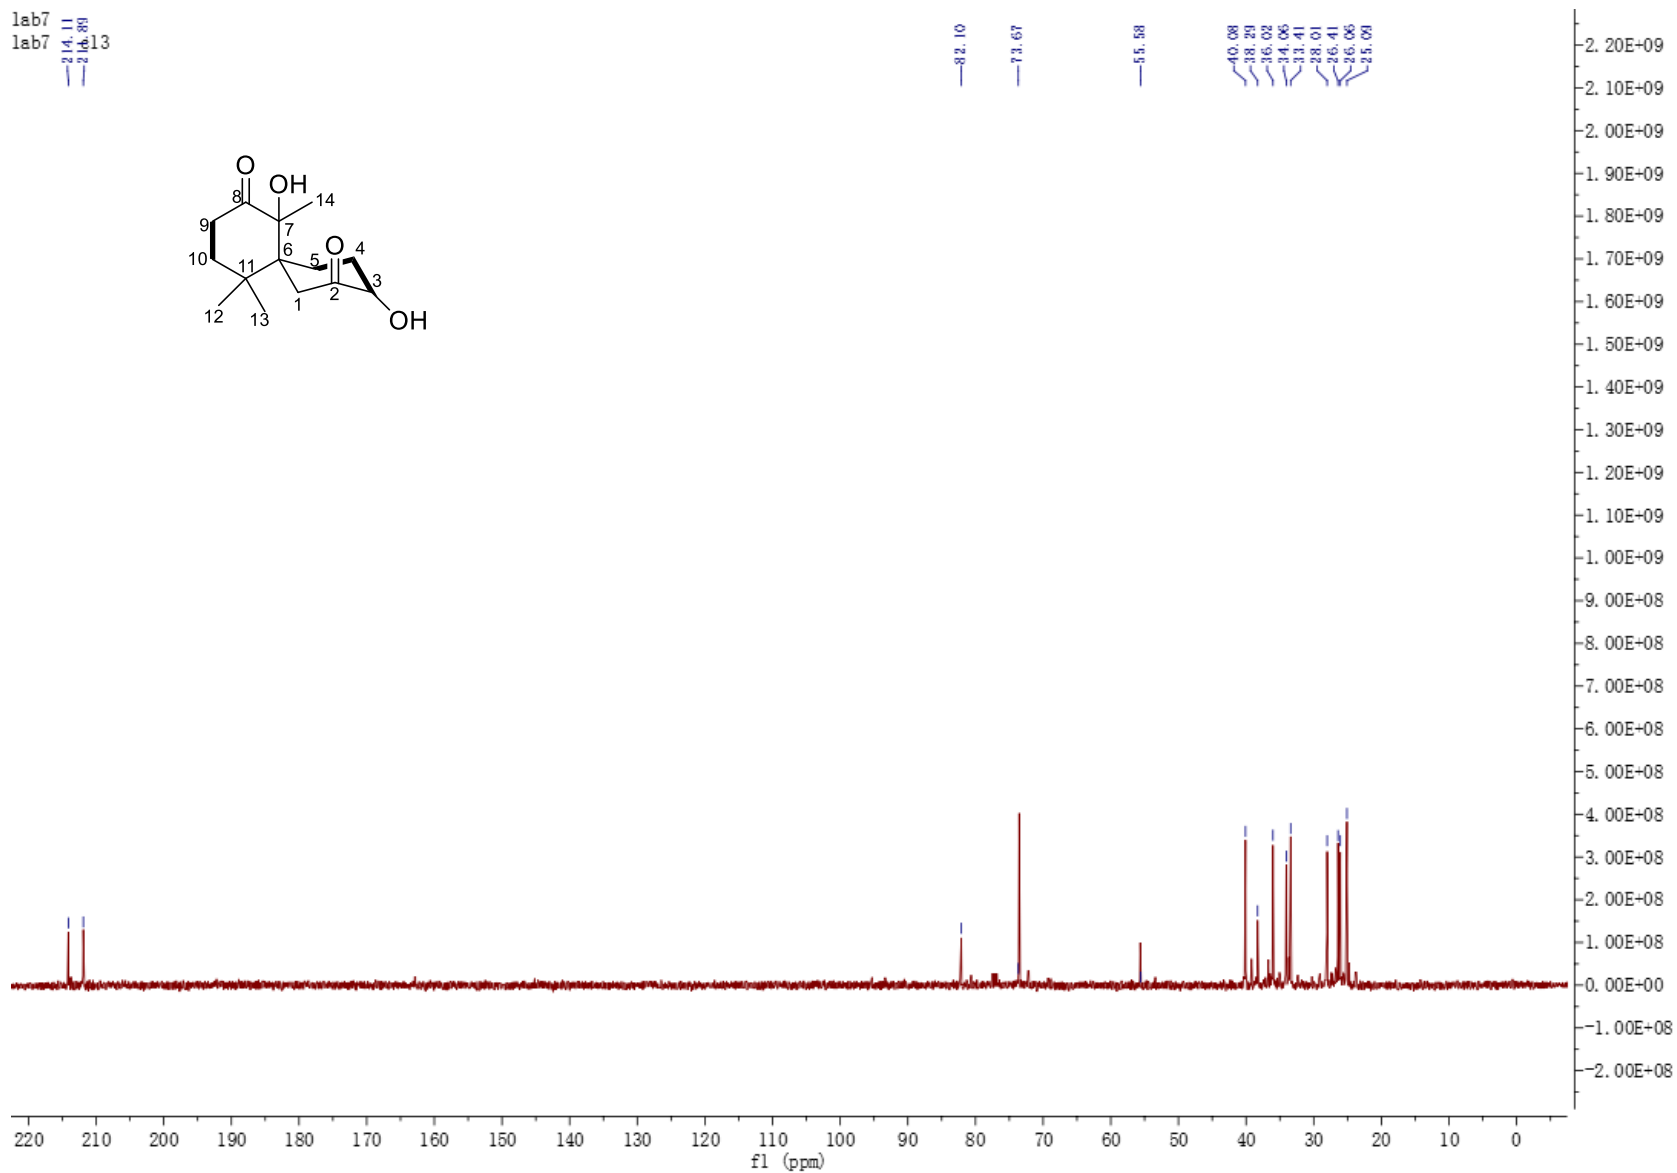

**Figure S6.** <sup>13</sup>C NMR (400MHz, CDCl<sub>3</sub>) spectrum of antroalbol H

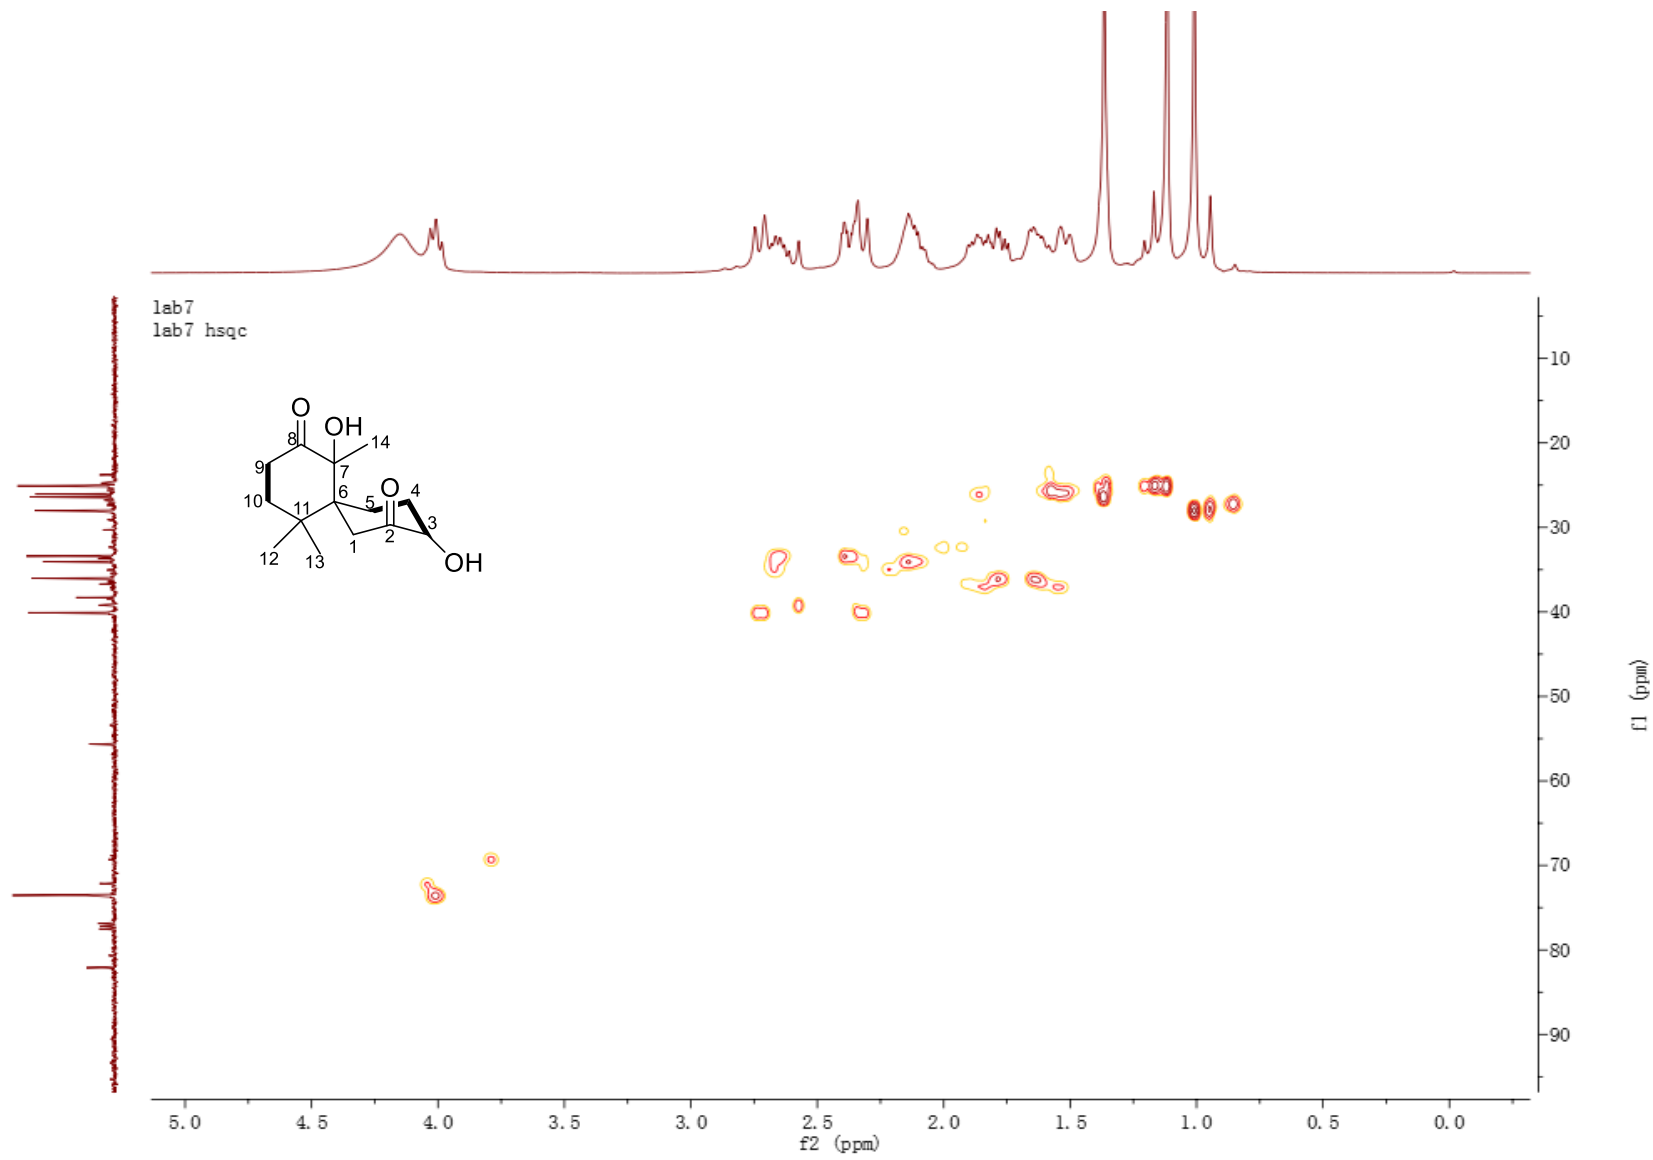

**Figure S7.** HSQC spectrum of antroalbol H

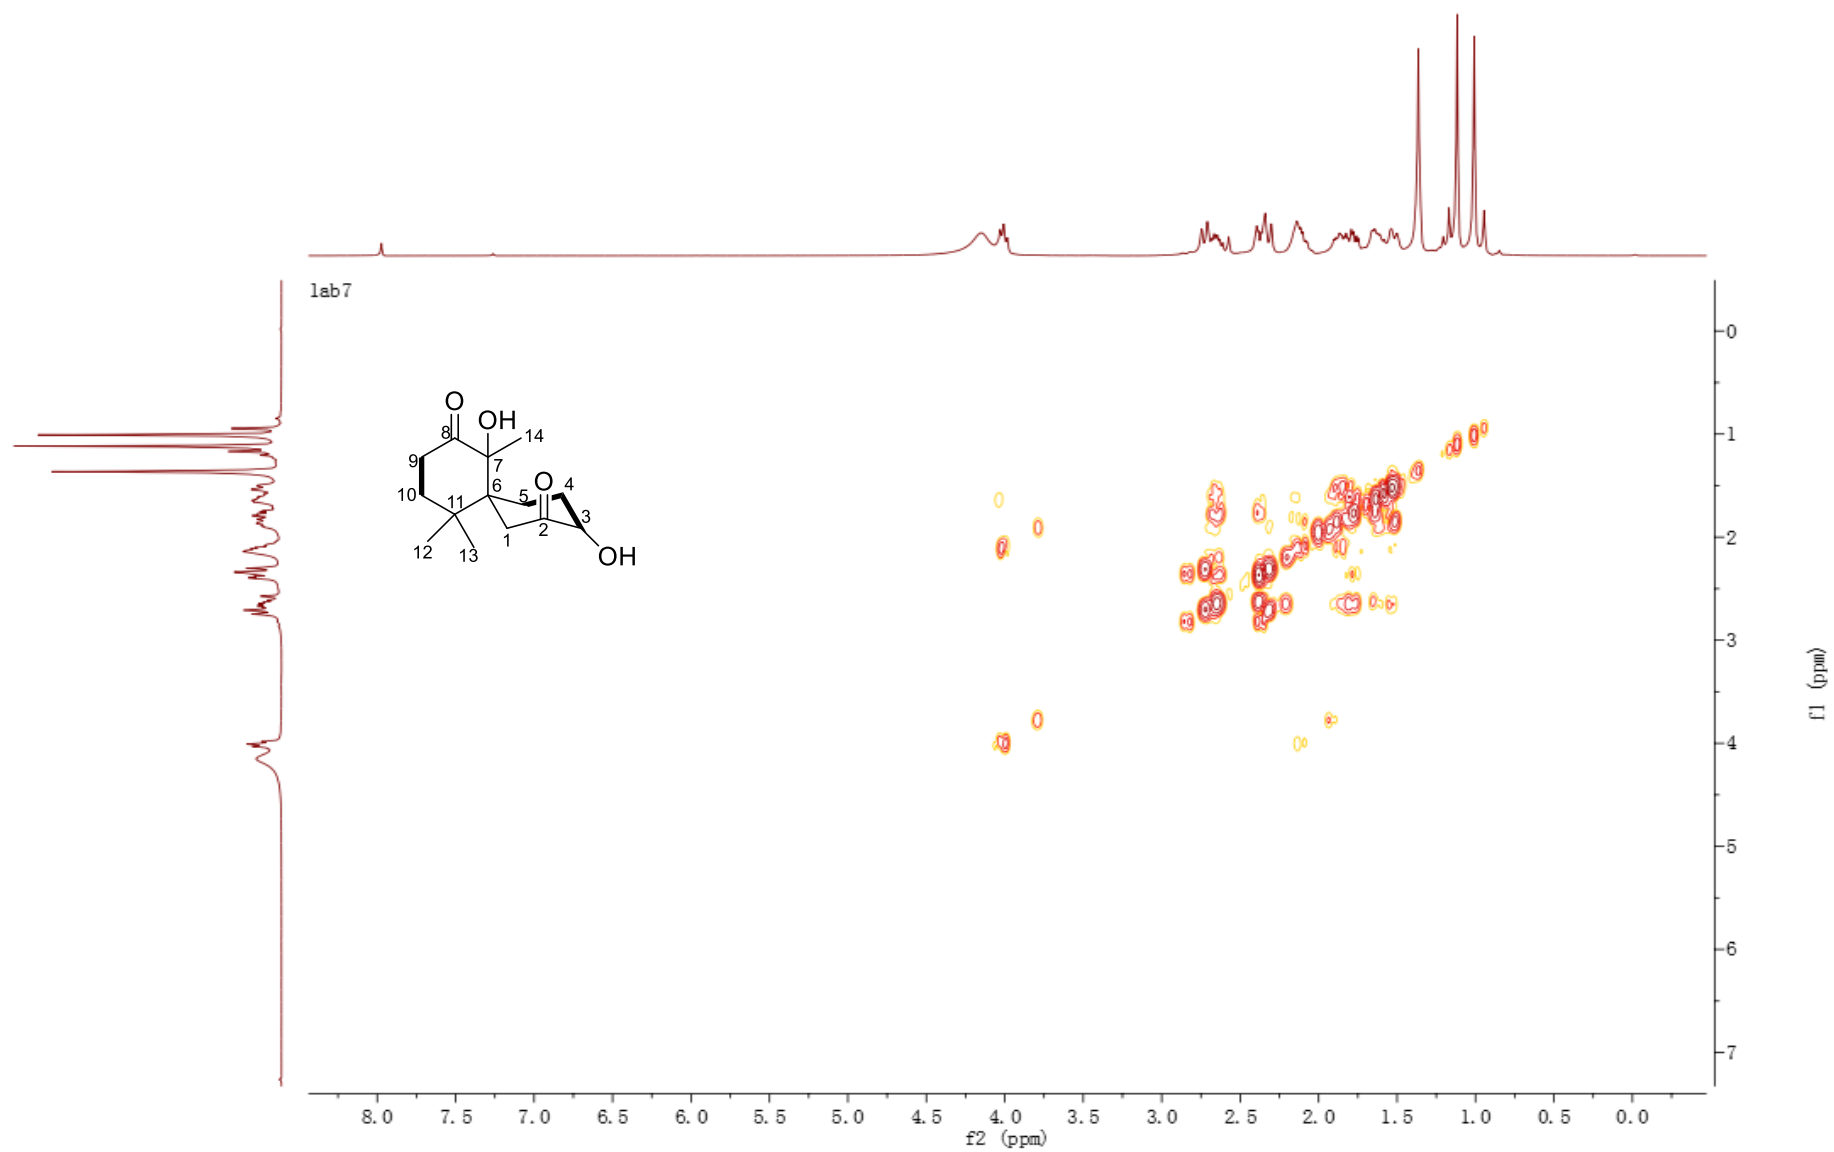

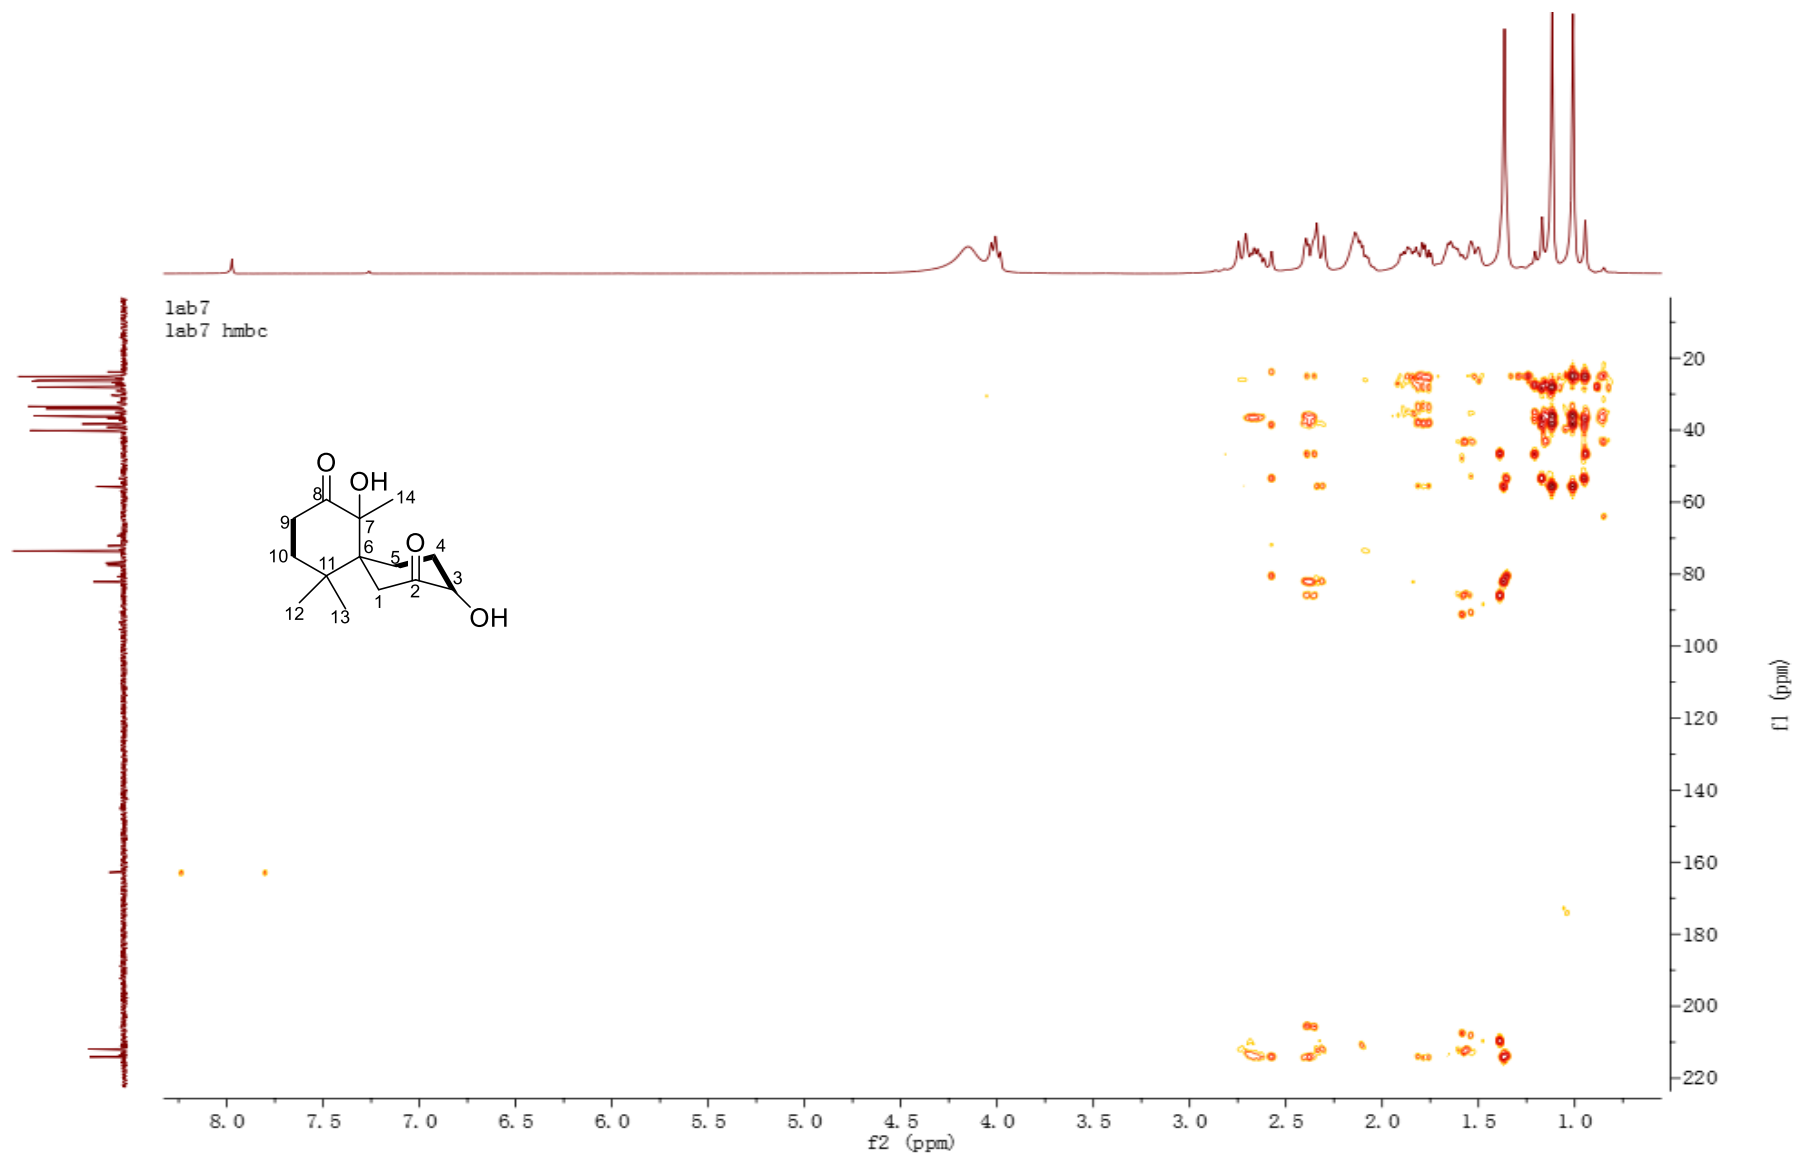

**Figure S9.** HMBC spectrum of antroalbol H

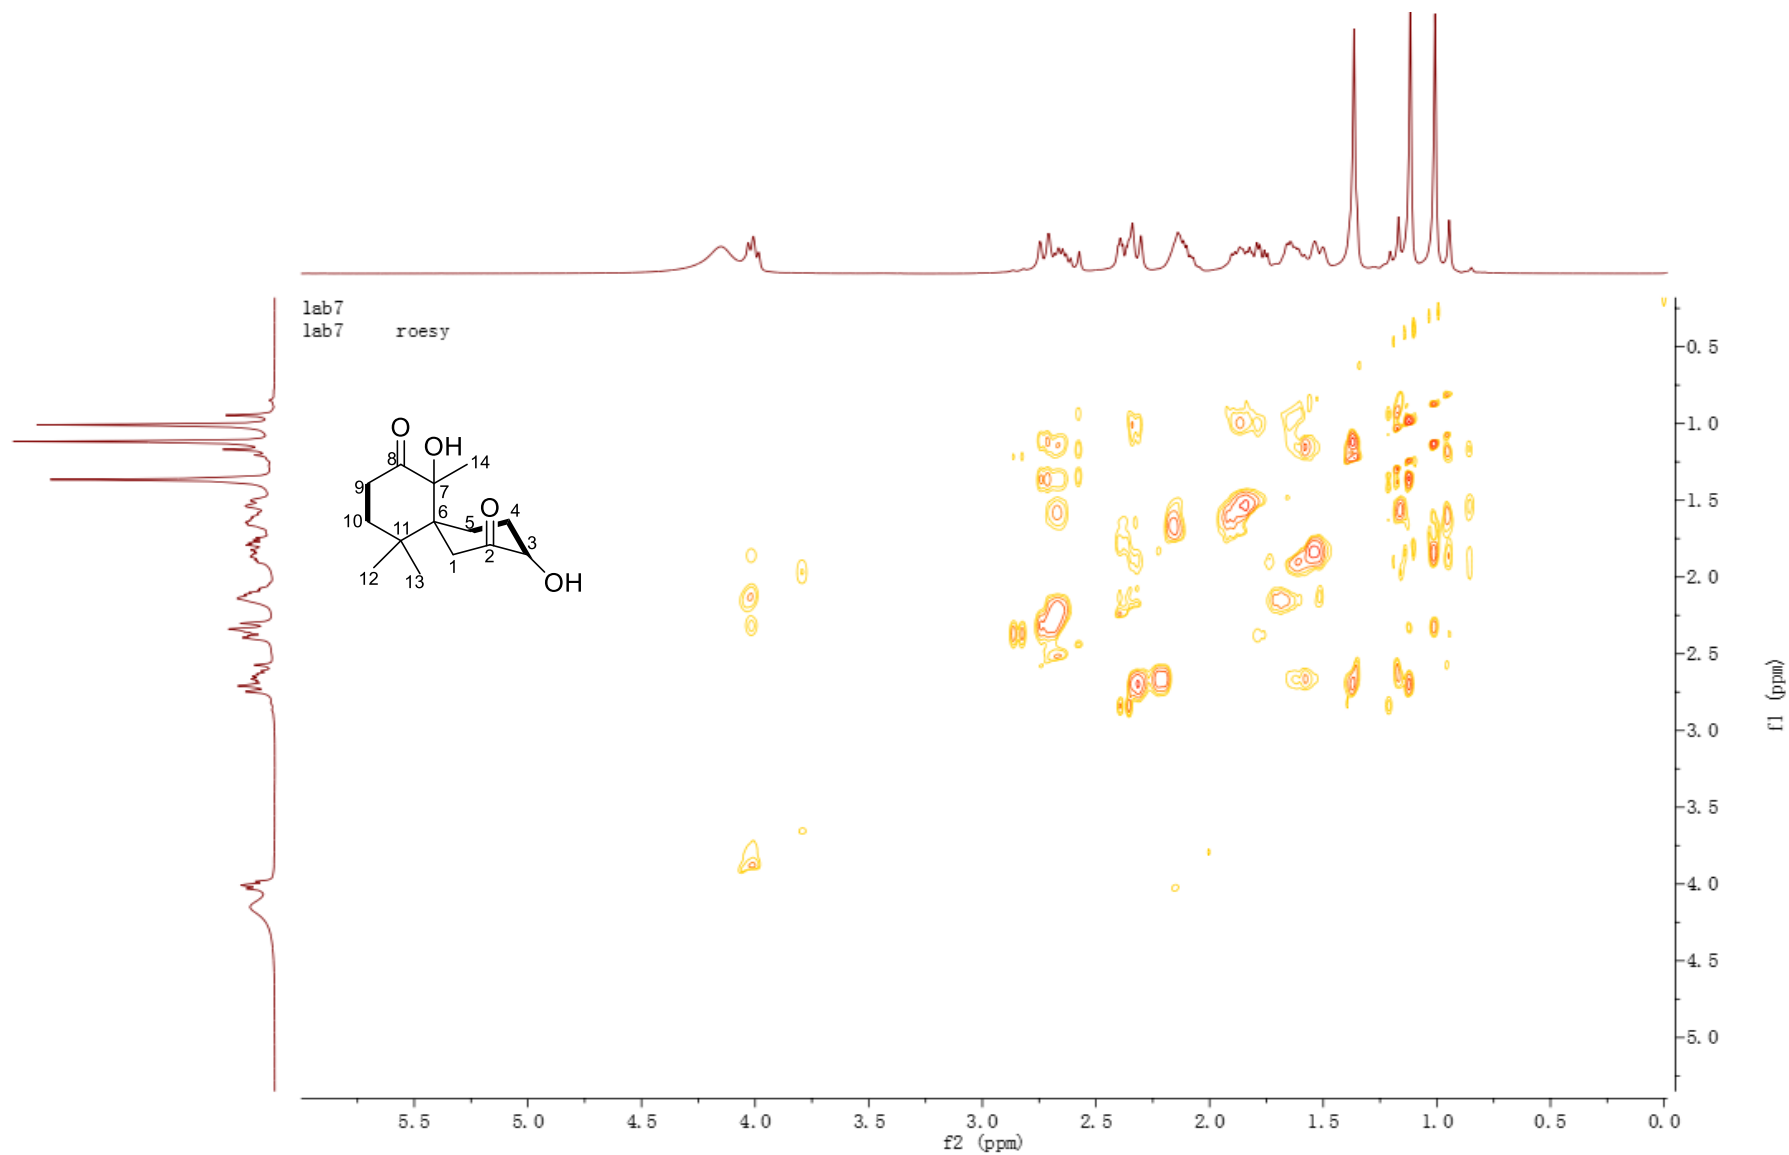

**Figure S10.** ROESY spectrum of antroalbol H

## Elemental Composition Report

### Single Mass Analysis

Tolerance = 10.0 PPM / DBE: min = -10.0, max = 120.0

Selected filters: None

Monoisotopic Mass, Odd and Even Electron Ions

19 formula(e) evaluated with 1 results within limits (up to 51 closest results for each mass)

Elements Used:

C: 0-200 H: 0-400 O: 1-4

lab7

13:46:38 21-Jun-2012

Voltage EI+

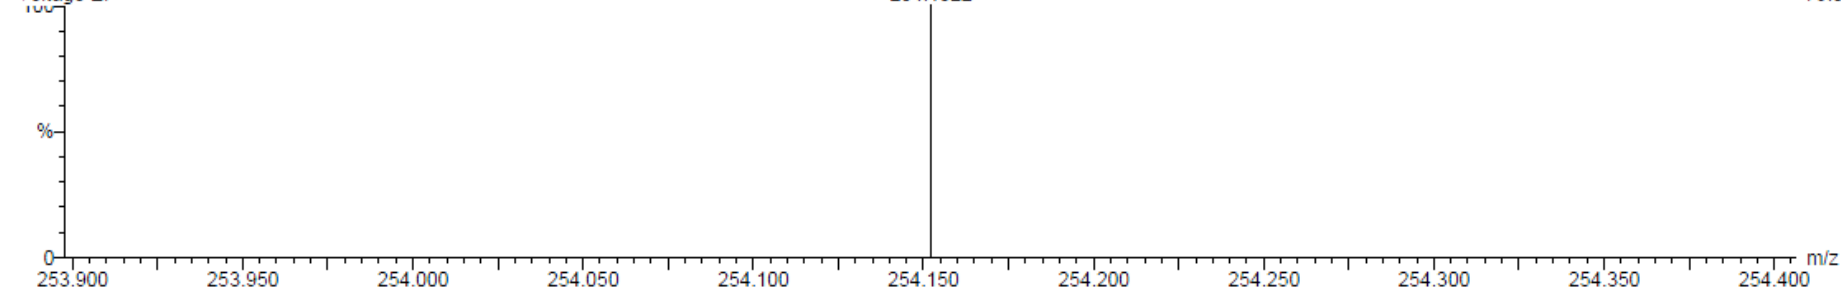

Autospec Premier  
P776  
79.3

| Mass     | Calc. Mass | mDa | PPM | DBE | i-FIT     | Formula    |
|----------|------------|-----|-----|-----|-----------|------------|
| 254.1522 | 254.1518   | 0.4 | 1.6 | 4.0 | 5546047.5 | C14 H22 O4 |

Figure S11. HR-ESI-MS spectrum of antroalbol H

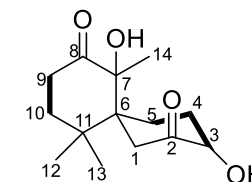



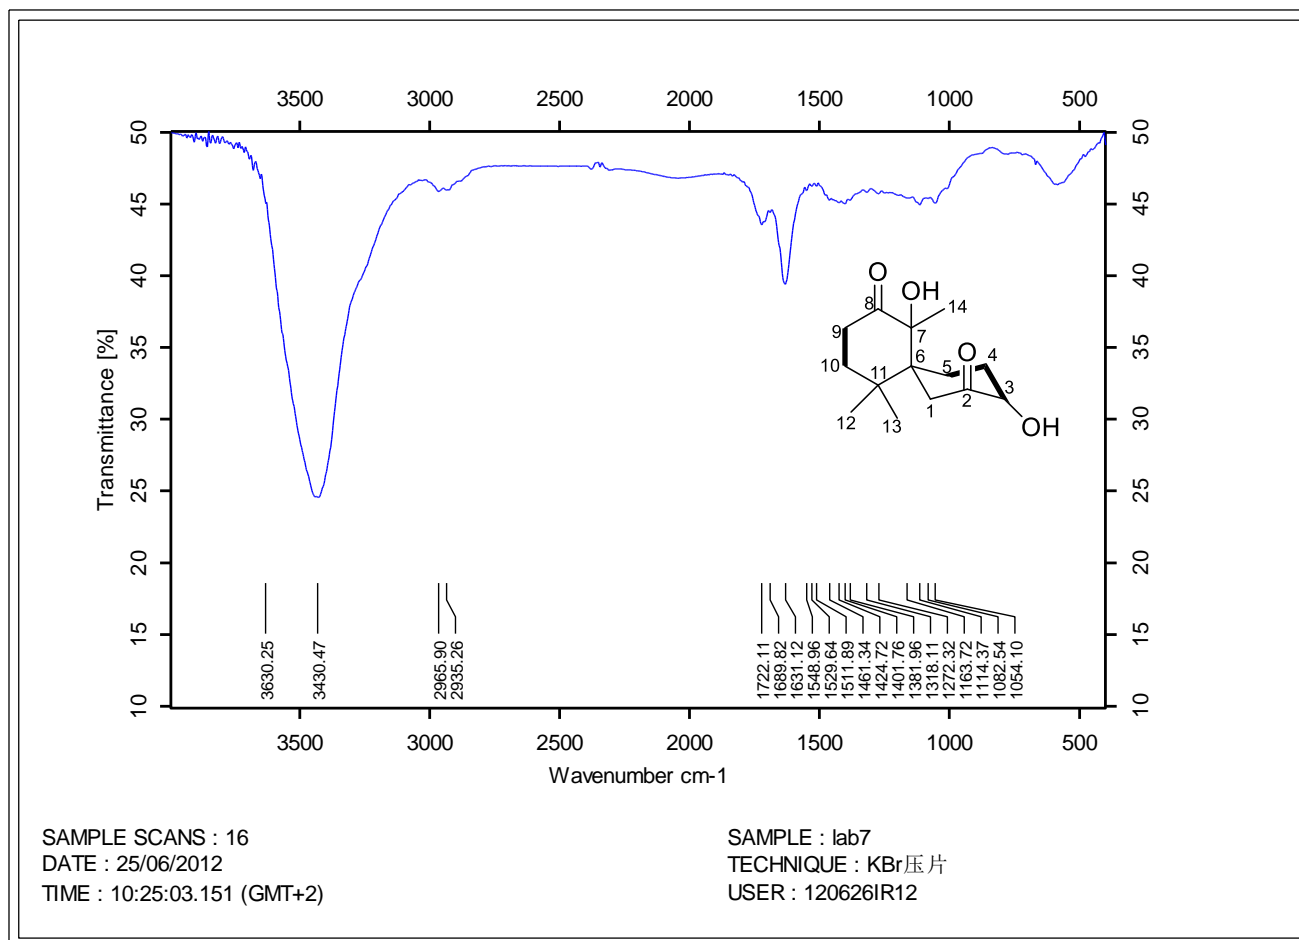

Figure S12. IR spectrum of antroalbol H
